# Supplementary material for: Evaporation and sublimation measurement and modeling of an alpine saline lake influenced by freeze–thaw on the Qinghai–Tibet Plateau
Source: Copernicus journal article supplement (doi:10.5194/hess-28-163-2024), 2024-01-10
Supplement: Supplementary file 1 [file hess-28-163-2024-supplement.pdf]

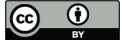

*Supplement of*

## **Evaporation and sublimation measurement and modeling of an alpine saline lake influenced by freeze–thaw on the Qinghai–Tibet Plateau**

**Fangzhong Shi et al.**

*Correspondence to:* Xiaoyan Li (xyli@bnu.edu.cn)

The copyright of individual parts of the supplement might differ from the article licence.

31 **Figures**

32 **Fig. S1.**

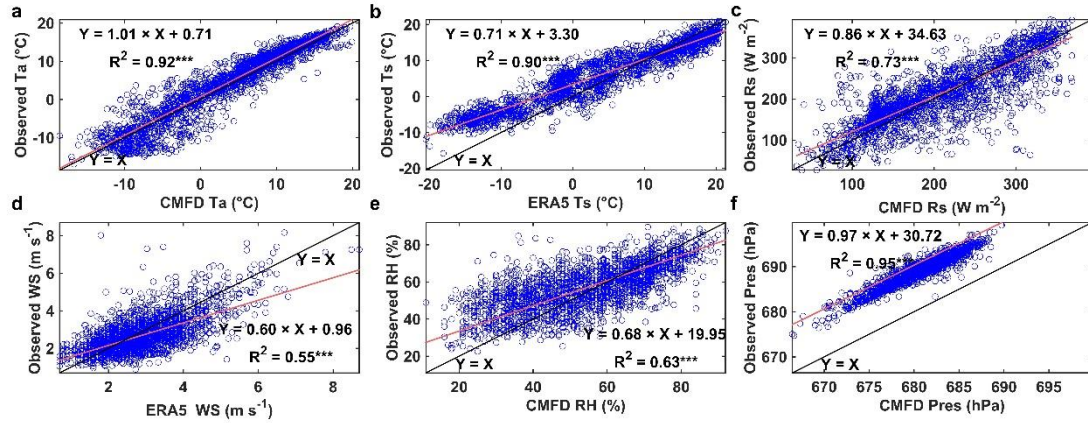

33

34 **Fig. S1. Relationship between the daily air temperature ( $T_a$ ) from the China Regional High-**  
35 **Temporal-Resolution Surface Meteorological Elements-Driven Dataset (CMFD), lake surface**  
36 **temperature ( $T_s$ ) from the interim reanalysis dataset v5 (ERA5), downward shortwave**  
37 **radiation ( $R_s$ ) from CMFD, daily wind speed ( $WS$ ) from ERA5, daily relative humidity ( $RH$ ),**  
38 **and air pressure ( $Pres$ ) from CMFD with the observed  $T_a$  (a),  $T_s$  (b),  $R_s$  (c),  $WS$  (d),  $RH$  (e),**  
39 **and  $Pres$  (f) in Qinghai Lake.**

40

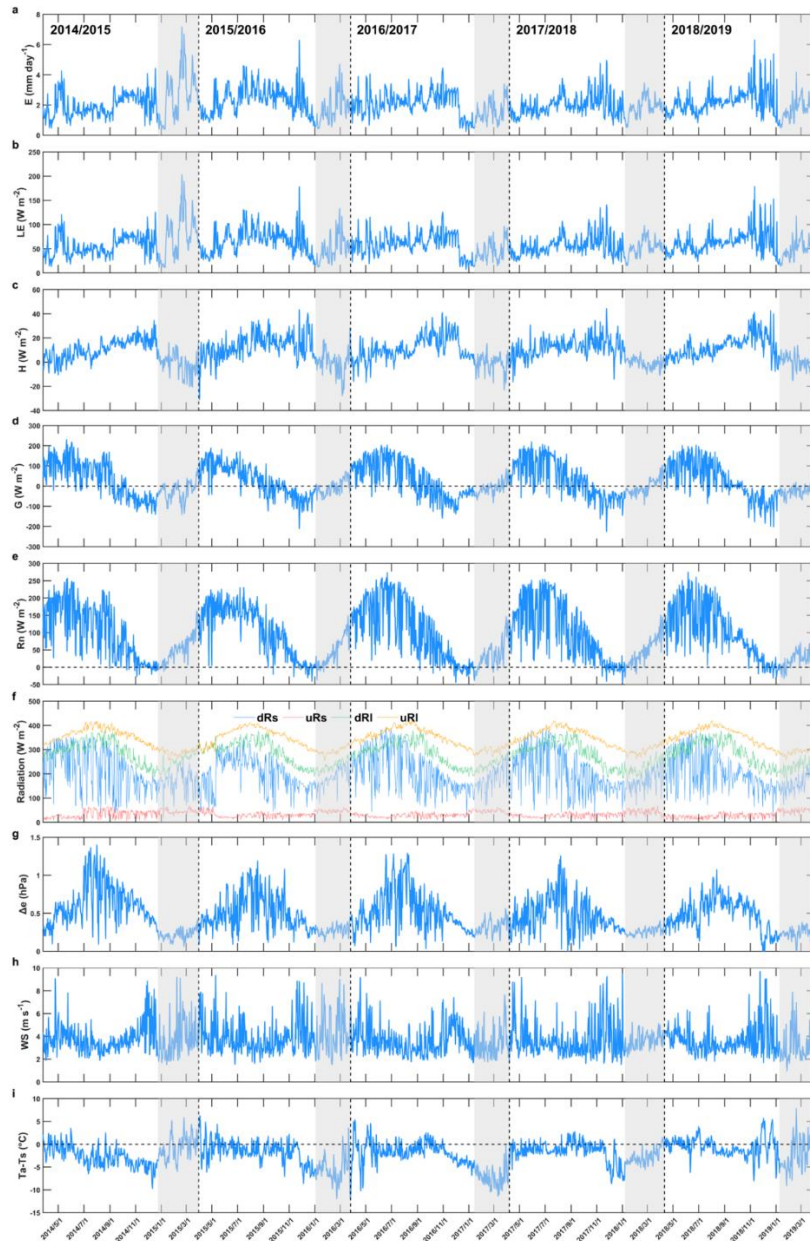

42

43 Fig. S2. The time series of the daily lake evaporation (E), latent heat (LE), sensible heat (H),  
 44 heat storage change (G), net radiation (Rn), four radiation components (incoming shortwave:  
 45 dRs, reflected shortwave: uRs, and incoming and outgoing longwave radiation: dRI and uRI),  
 46 vapor pressure difference ( $\Delta e$ ), wind speed (U), and the difference between air temperature  
 47 and lake surface temperature ( $T_a - T_s$ ) of Qinghai Lake (QHL) during the ice-free and ice-  
 48 covered periods (IFP and ICP) from 2014 to 2018. The gray area indicates ice-covered period.  
 49 The labels 2014/2015, 2015/2016, 2016/2017, 2017/2018, and 2018/2019 indicate the cycle year of  
 50 freeze-thaw cycling

51 **Fig. S3.**

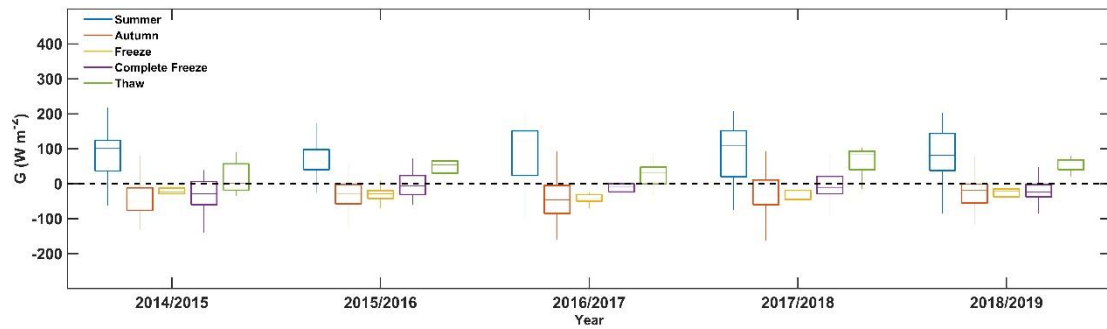

52

53 **Fig. S3. Heat storage change (G) in Qinghai Lake during summer, autumn, freeze, complete**  
54 **freeze, and thaw periods in each year from 2014 to 2018.** The whiskers indicate the 1.5  
55 interquartile range. Summer and autumn last from June to August and September to November,  
56 respectively. The labels 2014/2015, 2015/2016, 2016/2017, 2017/2018, and 2018/2019 indicate the  
57 cycle year of freeze–thaw cycling.

58

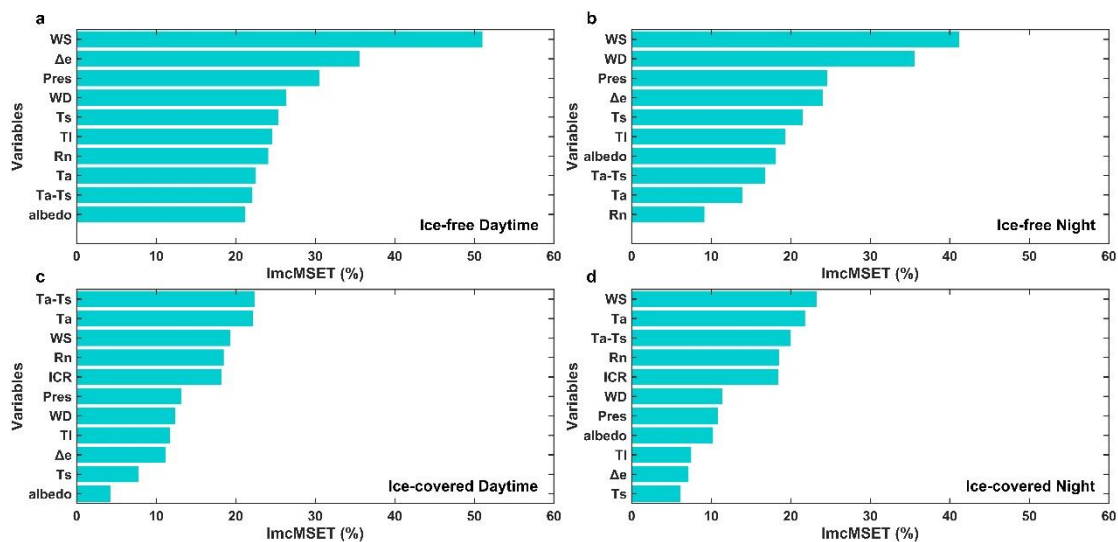

60

61 **Fig. S4. Importance of the daytime and nighttime climate factors to the evaporation (E) rate**  
 62 **of Qinghai Lake during the ice-free and ice-covered periods (IFP and ICP). Rn,  $\Delta e$ , WS, WD,**  
 63 **Pres, Ta-Ts, TI, and ICR denote the net radiation, vapor pressure difference, wind speed, wind**  
 64 **direction, surface air pressure, difference between the air and lake surface temperatures, average**  
 65 **temperature of the lake body from 0 to 300 cm, and ice coverage rate, respectively.**

66

67 **Fig. S5.**

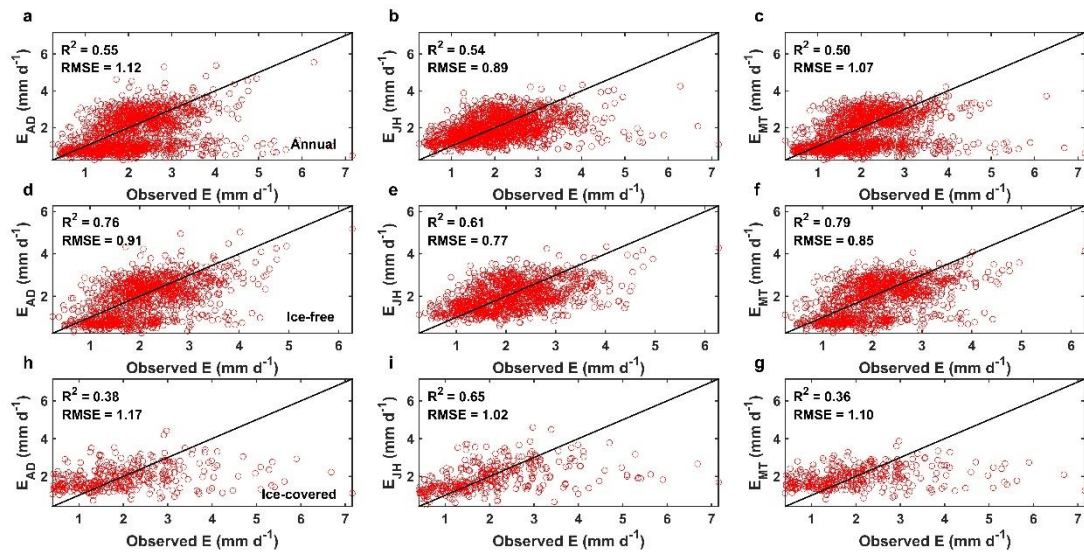

68

69 **Fig. S5. Relationship between the daily observed and simulated evaporation (E) with the**  
70 **atmospheric dynamics model ( $E_{AD}$ ), mass-transfer model ( $E_{MT}$ ), and Jensen-Haise model ( $E_{JH}$ )**  
71 **in the cycle year (annual: a~c), ice-free (d~f) and ice-covered (h~g) periods (AN, IFP and ICP)**  
72 **from 2014 to 2018.**

73

74

75 **Fig. S6.**

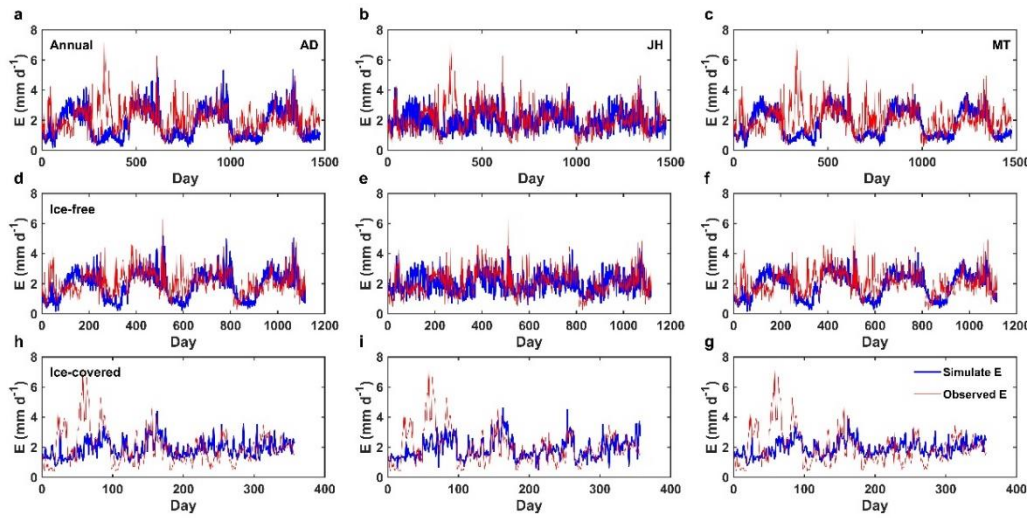

76

77 **Fig. S6. Daily observed and simulated evaporation (E) with the atmospheric dynamics model**  
78 **(E<sub>AD</sub>), mass-transfer model (E<sub>MT</sub>), and Jensen-Haise model (E<sub>JH</sub>) in the cycle year (annual:**  
79 **a~c), ice-free (d~f) and ice-covered (h~g) periods (AN, IFP and ICP) from 2014 to 2018.**

80

81

82 **Fig. S7.**

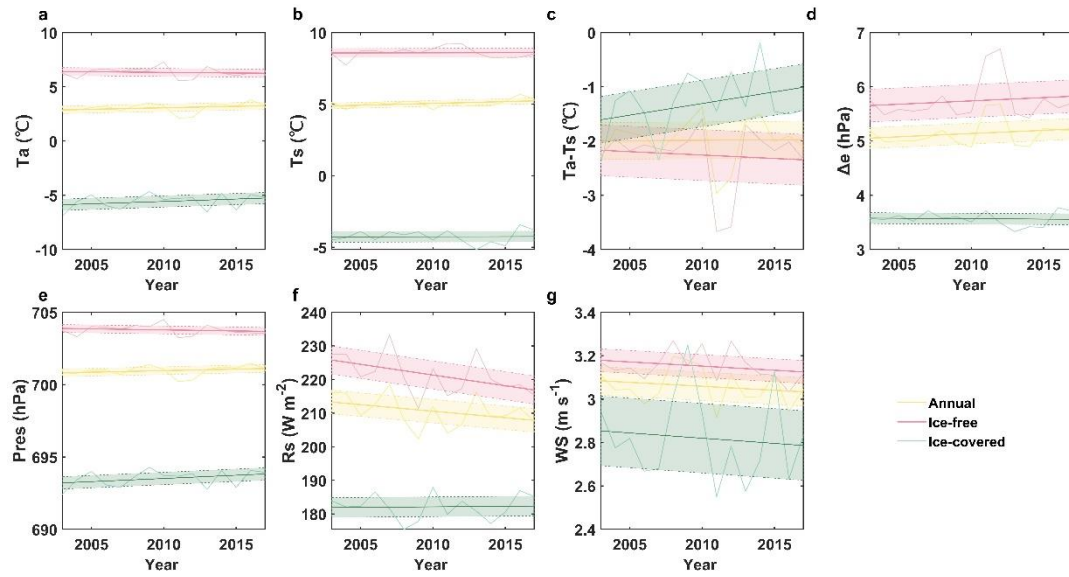

83

84 **Fig. S7. Interannual variability in the air temperature ( $T_a$ ), lake surface temperature ( $T_s$ ),**  
85 **difference between  $T_a$  and  $T_s$  ( $T_a - T_s$ ), vapor pressure difference ( $\Delta e$ ), air pressure (Pres),**  
86 **downward shortwave radiation ( $R_s$ ), and wind speed (WS) in the cycle year (annual: AN), ice-**  
87 **free and ice-covered periods (IFP and ICP) from 2003 to 2017. The shading indicates the 95%**  
88 **confidence interval of the trend line.**



89 **Fig. S8.**

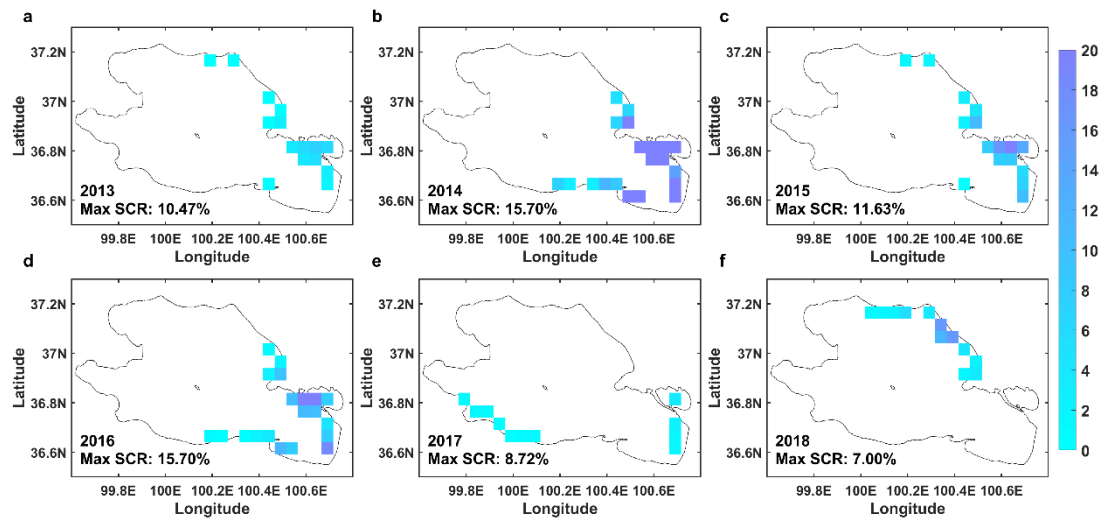

90

91 **Fig. S8. Spatial distribution of average snow depth (cm) in Qinghai Lake from 2013 to 2018.**

92 Max SCR means the maximal snow coverage rate.

## TABLES

**Table S1. The information about variables from observed, reanalysis, model and remote sensing datasets.**

| Dataset                            | Instrument type                                                                                                                 | Height from the lake surface/Spatial resolution | Time resolution | Purpose                                                                    |
|------------------------------------|---------------------------------------------------------------------------------------------------------------------------------|-------------------------------------------------|-----------------|----------------------------------------------------------------------------|
| Observed H and LE                  | EC system (Three-dimensional sonic anemometer: CSAT3, Campbell, USA, and open-path infrared gas analyzer: EC150, Campbell, USA) | 17.3 m                                          | 30 min          | Evaporation and energy calculation, and model calibration and verification |
| Observed Ta, RH and Pres           | HMP155, Vaisala, Finland                                                                                                        | 12.5 m                                          | 30 min          |                                                                            |
| Observed WS and WD                 | 05103, R.M. Young, USA                                                                                                          | 12.5 m                                          | 30 min          |                                                                            |
| Observed Ts                        | SI-111, Campbell, USA                                                                                                           | 0                                               | 30 min          | Analysis of evaporation influence factors                                  |
| Observed Tl                        | 109L, Campbell, USA                                                                                                             | -0.2 to -3.0 m                                  | 30 min          |                                                                            |
| Observed precipitation             | TE525, Campbell, USA                                                                                                            | 10 m                                            | 30 min          |                                                                            |
| Observed four-component radiometer | CNR4, Kipp&Zonen, Netherlands                                                                                                   | 10 m                                            | 30 min          |                                                                            |
| ERA5 Ts                            | \                                                                                                                               | 0.1°                                            | hourly          | Model input                                                                |
| ERA5 WS                            | \                                                                                                                               | 0.1°                                            | daily           |                                                                            |
| CMFD Ta, Pres, RH and Rs           | \                                                                                                                               | 0.1°                                            | daily           |                                                                            |
| Lake ice coverage                  | \                                                                                                                               | \                                               | daily           | Lake ice phenology dividing                                                |

Notes: H, LE, Ta, RH, Pres, WS, WD, Ts, Tl, and Rs are the abbreviation of sensible heat, latent heat, air temperature, relative humidity, air pressure, wind speed, wind direction, lake surface temperature, water temperature, and downward shortwave radiation, respectively. ERA5 and CMFD mean the interim reanalysis dataset v5 and China Regional High-Temporal-Resolution Surface Meteorological Elements-Driven Dataset, respectively. Four-component radiometer is the incoming shortwave, reflected shortwave, and incoming and outgoing longwave radiation.

**Table S2. Daily mean evaporation of Qinghai Lake (QHL) in the cycle year (annual: AN), ice-free and ice-covered periods (IFP and ICP) from 2014 to 2018.**

| Daily mean evaporation (mm d <sup>-1</sup> )   |             |             |             |             |             |
|------------------------------------------------|-------------|-------------|-------------|-------------|-------------|
| Periods                                        | 2014        | 2015        | 2016        | 2017        | 2018        |
| AN                                             | 2.16 ± 1.07 | 2.21 ± 0.93 | 2.02 ± 0.81 | 1.96 ± 0.69 | 2.10 ± 0.81 |
| IFP                                            | 1.96 ± 0.73 | 2.34 ± 0.89 | 2.15 ± 0.79 | 1.99 ± 0.70 | 2.24 ± 0.81 |
| ICP                                            | 2.71 ± 1.55 | 1.77 ± 0.93 | 1.57 ± 0.72 | 1.85 ± 0.62 | 1.72 ± 0.67 |
| Daytime mean evaporation (mm d <sup>-1</sup> ) |             |             |             |             |             |
| AN                                             | 1.21 ± 0.60 | 1.30 ± 0.62 | 1.11 ± 0.46 | 1.11 ± 0.43 | 1.18 ± 0.48 |
| IFP                                            | 1.10 ± 0.44 | 1.36 ± 0.61 | 1.18 ± 0.44 | 1.12 ± 0.45 | 1.23 ± 0.49 |
| ICP                                            | 1.52 ± 0.83 | 1.08 ± 0.59 | 0.87 ± 0.45 | 1.09 ± 0.37 | 1.01 ± 0.41 |
| Night mean evaporation (mm d <sup>-1</sup> )   |             |             |             |             |             |
| AN                                             | 0.95 ± 0.56 | 0.91 ± 0.45 | 0.91 ± 0.48 | 0.84 ± 0.36 | 0.93 ± 0.42 |
| IFP                                            | 0.87 ± 0.38 | 0.98 ± 0.43 | 0.97 ± 0.49 | 0.87 ± 0.37 | 1.00 ± 0.42 |
| ICP                                            | 1.18 ± 0.85 | 0.69 ± 0.46 | 0.70 ± 0.38 | 0.77 ± 0.32 | 0.72 ± 0.36 |

**Table S3. Multiyear average contributions of the changes in air temperature (Ta), lake surface temperature (Ts), downward shortwave radiation (Rs), and wind speed (WS) to the simulated evaporation of Qinghai Lake in the cycle year (annual: AN), ice-free and ice-covered periods (IFP and ICP) from 2003 to 2017.**

|                       | Ta           | Ts            | Rs           | WS             |
|-----------------------|--------------|---------------|--------------|----------------|
| E Rate in AN (mm)     | 0.02 ± 0.03  | 0.02 ± 0.06   | -0.02 ± 0.01 | -0.03 ± 0.05   |
| E Rate in IFP (mm)    | 0.01 ± 0.04  | 0.05 ± 0.07   | 0.00 ± 0.00  | -0.01 ± 0.03   |
| E Rate in ICP (mm)    | 0.05 ± 0.05  | -0.06 ± 0.03  | -0.06 ± 0.05 | -0.11 ± 0.14   |
| Sum E in AN (mm)      | 7.21 ± 12.34 | 8.26 ± 20.78  | -6.48 ± 5.03 | -12.87 ± 17.82 |
| Sum E in IFP (mm)     | 2.54 ± 9.72  | 13.58 ± 20.75 | 0.00 ± 0.00  | -1.71 ± 7.07   |
| Sum E in ICP (mm)     | 4.67 ± 5.44  | -5.32 ± 3.02  | -6.48 ± 4.77 | -11.17 ± 14.29 |
| Percentage in AN (%)  | 1.54 ± 1.20  | 2.21 ± 2.46   | 0.91 ± 0.65  | 2.46 ± 1.63    |
| Percentage in IFP (%) | 1.31 ± 1.31  | 3.54 ± 3.55   | 0.00 ± 0.00  | 1.01 ± 0.87    |
| Percentage in ICP (%) | 3.09 ± 2.22  | 2.94 ± 1.14   | 3.23 ± 2.28  | 7.56 ± 4.26    |

**Table S4. Lake ice phenology of Qinghai Lake from 2002 to 2018.**

|      | IFS       | FUS        | FUE        | BES       | BUE       | LIF | LIC | LCY |
|------|-----------|------------|------------|-----------|-----------|-----|-----|-----|
| 2002 |           | 2002/12/25 | 2003/1/4   | 2003/3/26 | 2003/3/30 |     | 96  |     |
| 2003 | 2003/3/31 | 2003/12/25 | 2004/1/3   | 2004/3/13 | 2004/3/28 | 270 | 95  | 365 |
| 2004 | 2004/3/29 | 2004/12/27 | 2005/1/8   | 2005/3/14 | 2005/3/30 | 274 | 94  | 368 |
| 2005 | 2005/3/31 | 2005/12/16 | 2005/12/24 | 2006/3/28 | 2006/4/6  | 261 | 112 | 373 |
| 2006 | 2006/4/7  | 2006/12/26 | 2007/1/11  | 2007/3/30 | 2007/4/3  | 264 | 99  | 363 |
| 2007 | 2007/4/4  | 2007/12/27 | 2008/1/17  | 2008/3/31 | 2008/4/11 | 268 | 107 | 375 |
| 2008 | 2008/4/12 | 2008/12/22 | 2009/1/1   | 2009/3/20 | 2009/3/30 | 255 | 99  | 354 |
| 2009 | 2009/3/31 | 2009/12/24 | 2010/1/1   | 2010/3/20 | 2010/4/2  | 269 | 100 | 369 |
| 2010 | 2010/4/3  | 2010/12/16 | 2010/12/31 | 2011/4/5  | 2011/4/15 | 258 | 121 | 379 |
| 2011 | 2011/4/16 | 2011/12/21 | 2012/1/6   | 2012/4/1  | 2012/4/14 | 250 | 116 | 366 |
| 2012 | 2012/4/15 | 2012/12/12 | 2012/12/27 | 2013/3/24 | 2013/4/3  | 242 | 113 | 355 |
| 2013 | 2013/4/4  | 2013/12/20 | 2014/1/8   | 2014/3/3  | 2014/3/25 | 261 | 96  | 357 |
| 2014 | 2014/3/26 | 2014/12/23 | 2015/1/4   | 2015/3/14 | 2015/3/29 | 273 | 97  | 370 |
| 2015 | 2015/3/30 | 2015/12/31 | 2016/1/22  | 2016/3/12 | 2016/3/22 | 277 | 83  | 360 |
| 2016 | 2016/3/23 | 2017/1/9   | 2017/1/23  | 2017/3/18 | 2017/4/1  | 293 | 83  | 376 |
| 2017 | 2017/4/2  | 2017/12/31 | 2018/1/10  | 2018/3/29 | 2018/4/3  | 274 | 94  | 368 |
| 2018 | 2018/4/4  | 2018/12/31 | 2019/1/10  | 2019/3/29 | 2019/4/3  | 272 | 94  | 366 |

Note: IFS, FUS, FUE, BUS, and BUE show the dates of ice-free start, freeze-up start, freeze-up end, break-up start, and break-up end, respectively. LIF, LIC, and LCY means the length of the ice-free period, ice-covered period, and the cycle year (annual: AN), respectively. The ice-covered rate data are from the National Tibetan Plateau Data Center (<https://data.tpdc.ac.cn/zh-hans/data/c242394c-fe1a-4840-9beb-0bf4a95d1231/?q=%E6%B9%96%E5%86%B0%E7%89%A9%E5%80%99>).
